# Supplementary material
Source: Springer Nature journal article supplement (https://www.springermedizin.de/resource/supplementary/12874_2011_654_MOESM8_ESM.pdf/9432334)
Supplement: MOESM8 [file 9432334]

## Conditional Probabilities of Seizure

| Parents        |                      | Probability |       |
|----------------|----------------------|-------------|-------|
| Fracture_skull | Intracranial_lesions | 1           | 0     |
| 1              | 1                    | 0.083       | 0.916 |
| 1              | 0                    | 0.027       | 0.972 |
| 0              | 1                    | 0.009       | 0.990 |
| 0              | 0                    | 0.005       | 0.994 |
